# Supplementary material for: A 3D pillared-layer metal–organic framework with fluorescence property for detection of nitroaromatic explosives
Source: Royal Society of Chemistry journal article supplement (doi:10.1039/c8nj05276j), 2018-12-13
Supplement: c8nj05276j1.pdf [file c8nj05276j1.pdf]

## Supporting information

### **A 3D pillared-layer metal-organic framework with fluorescence property for detection of nitroaromatic explosives**

Qi Wang,<sup>a</sup> Da Jun Liu,<sup>a</sup> Li Li Cui,<sup>a</sup> Xiao-Li Hu,<sup>\*a</sup> Xin-Long Wang,<sup>\*ab</sup> and Zhong-  
Min Su<sup>\*ab</sup>

<sup>a</sup>School of Chemistry and Environmental Engineering, Changchun University of  
Science and Technology, Changchun 130022, China. E-  
mail:huxiaoli1113@cust.edu.cn;

<sup>b</sup>Institute of Functional Material Chemistry, National&Local United Engineering Lab  
for Power Battery, Northeast Normal University, Changchun, 130024 Jilin, People's  
Republic of China. E-mail:zmsu@nenu.edu.cn

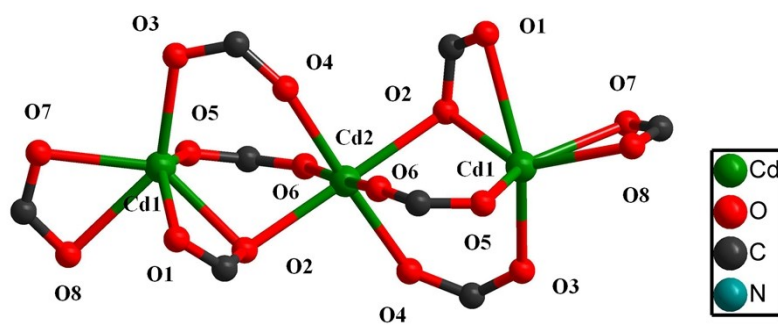

**Fig. S1** The coordination environments around the Cd(II) ions.

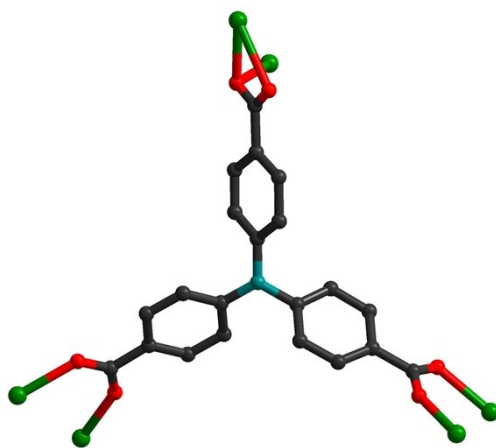

**Fig. S2** The bridging coordination mode of NTB ligand.

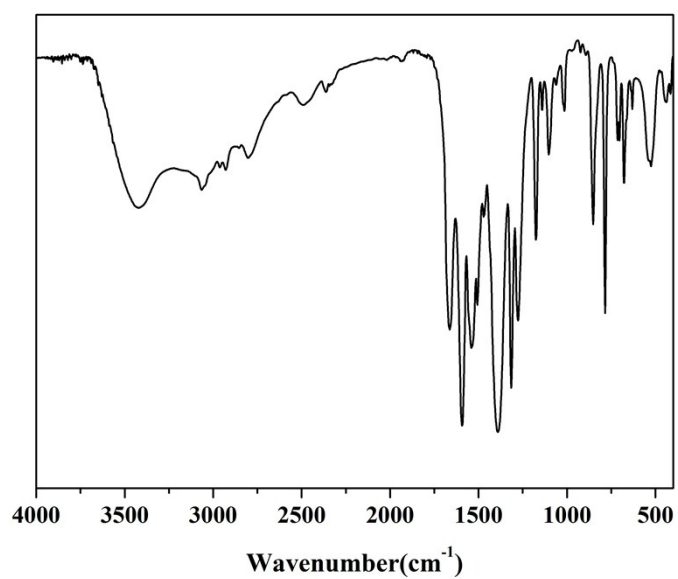

**Fig. S3** FT-IR spectra of **1**.

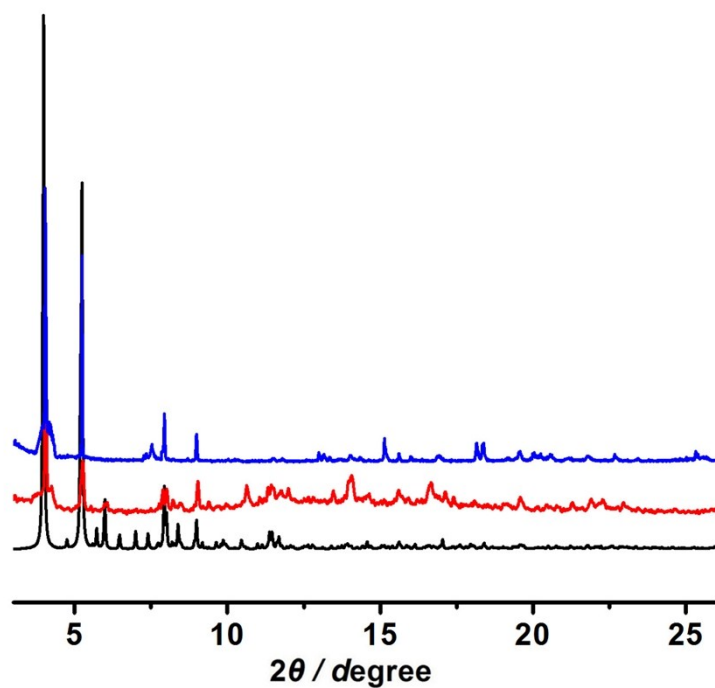

**Fig. S4** X-ray powder diffraction patterns of **1**: simulated (black), as-synthesized (red) and after luminescent quenching of PA(blue).

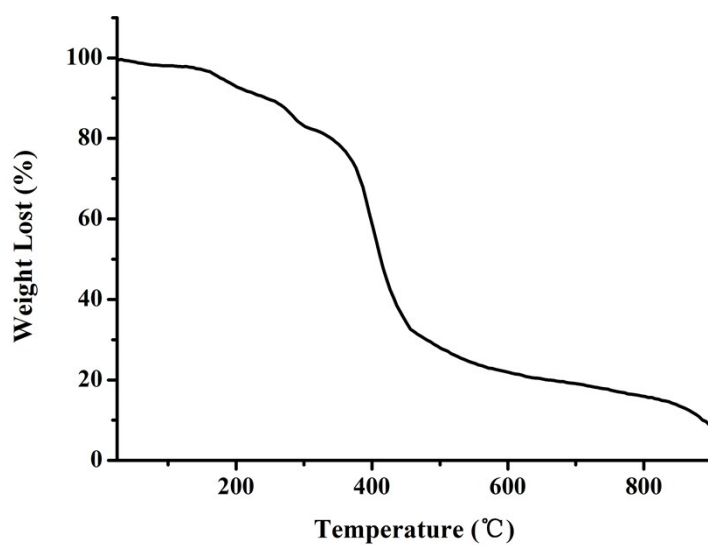

**Fig. S5** TG curves of **1**.

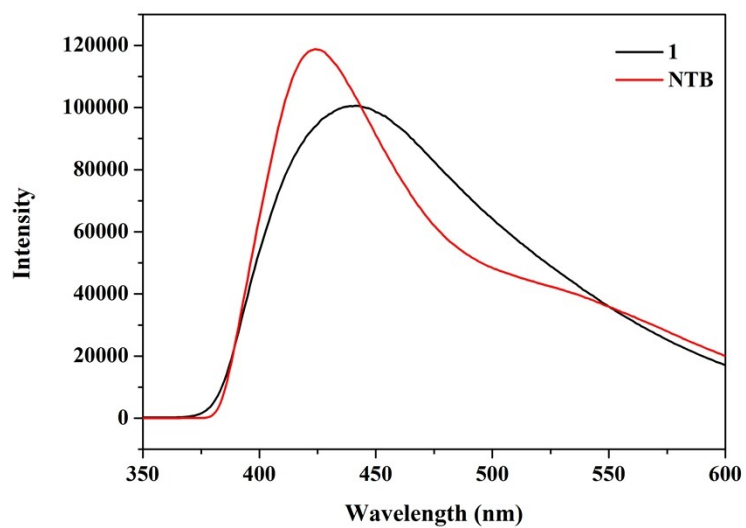

**Fig. S6** Photoluminescence spectra of NTB and **1** treated in DMF.

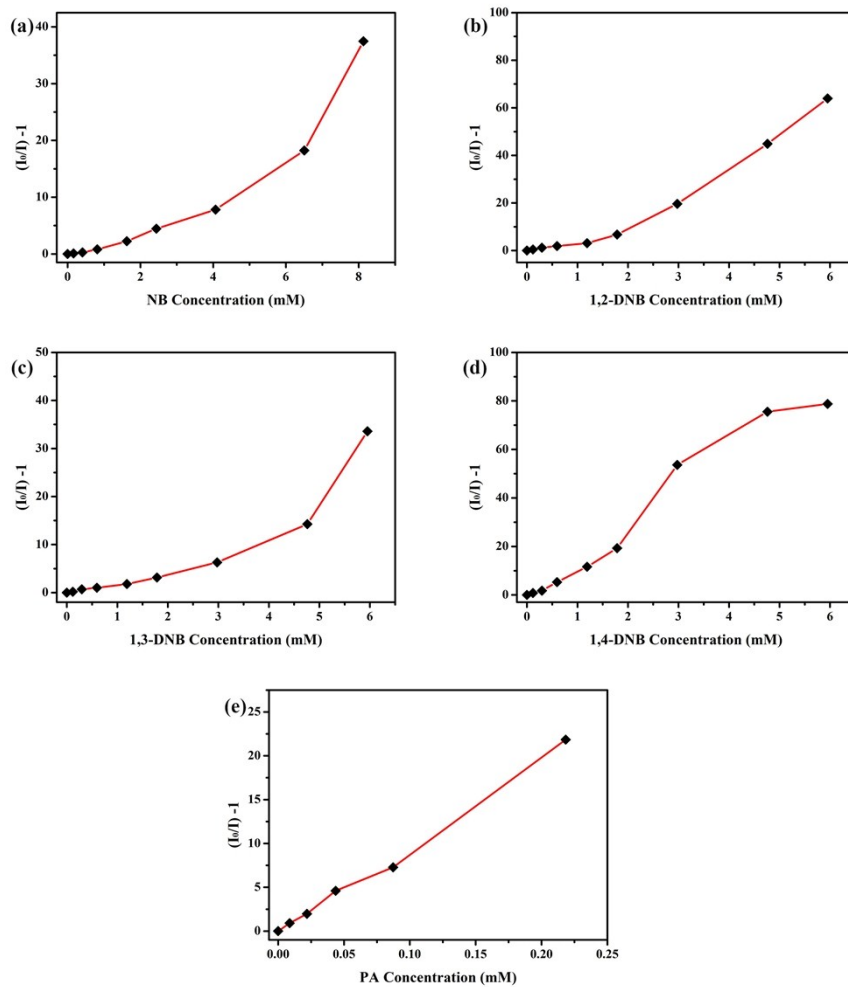

**Fig. S7** Corresponding Stern-Volmer plots of (a) NB, (b) 1,2-DNB, (c) 1,3-DNB, (d) 1,4-DNB and (e) PA.

**Table S1** Crystal data and structure refinements for **1**

|                                                                  | <b>1</b>                                                                       |
|------------------------------------------------------------------|--------------------------------------------------------------------------------|
| Formula                                                          | C <sub>66</sub> H <sub>72</sub> N <sub>8</sub> O <sub>20</sub> Cd <sub>3</sub> |
| Formula weight                                                   | 1634.20                                                                        |
| Crystal system                                                   | orthorhombic                                                                   |
| Space group                                                      | <i>Cmca</i>                                                                    |
| <i>a</i> (Å)                                                     | 35.549(5)                                                                      |
| <i>b</i> (Å)                                                     | 27.181(5)                                                                      |
| <i>c</i> (Å)                                                     | 23.930(5)                                                                      |
| $\alpha$ (°)                                                     | 90.000(5)                                                                      |
| $\beta$ (°)                                                      | 90.000(5)                                                                      |
| $\gamma$ (°)                                                     | 90.000(5)                                                                      |
| <i>V</i> (Å <sup>3</sup> )                                       | 23123(7)                                                                       |
| <i>Z</i>                                                         | 8                                                                              |
| <i>D</i> <sub>calcd.</sub> [gcm <sup>-3</sup> ]                  | 0.718                                                                          |
| <i>F</i> (000)                                                   | 4912                                                                           |
| Reflections collected                                            | 65424/10446                                                                    |
| <i>R</i> (int)                                                   | 0.0583                                                                         |
| Goodness-of-fit on <i>F</i> <sup>2</sup>                         | 1.068                                                                          |
| <i>R</i> <sub>1</sub> <sup>a</sup> [ <i>I</i> > 2σ ( <i>I</i> )] | 0.0399                                                                         |
| <i>wR</i> <sub>2</sub> <sup>b</sup>                              | 0.1229                                                                         |

**Table S2** Selected bond lengths [Å] for **1**.

|            |          |
|------------|----------|
| Cd(1)-O(2) | 2.282(3) |
| Cd(1)-O(1) | 2.572(3) |
| Cd(1)-O(5) | 2.212(3) |
| Cd(1)-O(3) | 2.212(3) |
| Cd(1)-O(8) | 2.402(4) |
| Cd(1)-O(7) | 2.296(4) |

|              |          |
|--------------|----------|
| Cd(2)-O(2)   | 2.308(3) |
| Cd(2)-O(2)#1 | 2.308(3) |
| Cd(2)-O(4)#1 | 2.187(3) |
| Cd(2)-O(4)   | 2.187(3) |
| Cd(2)-O(6)   | 2.245(3) |
| Cd(2)-O(6)#1 | 2.245(3) |

**Table S3** Selected angles [°] for **1**.

|                     |            |
|---------------------|------------|
| O(2)-Cd(1)-O(1)     | 53.19(10)  |
| O(2)-Cd(1)-O(8)     | 95.06(14)  |
| O(2)-Cd(1)-O(7)     | 139.02(16) |
| O(5)-Cd(1)-O(2)     | 120.09(11) |
| O(5)-Cd(1)-O(1)     | 102.35(12) |
| O(5)-Cd(1)-O(8)     | 141.10(15) |
| O(5)-Cd(1)-O(7)     | 88.08(16)  |
| O(3)-Cd(1)-O(2)     | 95.58(11)  |
| O(3)-Cd(1)-O(1)     | 148.01(11) |
| O(3)-Cd(1)-O(5)     | 99.81(13)  |
| O(3)-Cd(1)-O(23)    | 101.40(16) |
| O(3)-Cd(1)-O(8)     | 92.16(16)  |
| O(3)-Cd(1)-O(7)     | 109.08(18) |
| O(8)-Cd(1)-O(1)     | 84.90(15)  |
| O(7)-Cd(1)-O(1)     | 94.51(17)  |
| O(7)-Cd(1)-O(8)     | 53.08(17)  |
| O(2)-Cd(2)-O(2)#1   | 179.11(15) |
| O(4)#1-Cd(2)-O(2)#1 | 86.40(11)  |
| O(4)#1-Cd(2)-O(2)   | 94.23(11)  |
| O(4)-Cd(2)-O(2)     | 86.40(11)  |

|                     |            |
|---------------------|------------|
| O(4)-Cd(2)-O(2)#1   | 94.23(11)  |
| O(4)-Cd(2)-O(4)#1   | 89.53(19)  |
| O(4)#1-Cd(2)-O(6)#1 | 95.97(14)  |
| O(4)#1-Cd(2)-O(6)   | 174.38(13) |
| O(4)-Cd(2)-O(6)#1   | 174.38(13) |
| O(4)-Cd(2)-O(6)     | 95.97(14)  |
| O(6)#1-Cd(2)-O(2)#1 | 87.28(12)  |
| O(6)#1-Cd(2)-O(2)   | 92.02(12)  |
| O(6)-Cd(2)-O(2)     | 87.28(12)  |
| O(6)-Cd(2)-O(2)#1   | 92.03(12)  |
| O(6)#1-Cd(2)-O(6)   | 78.56(19)  |

**Table S4** The fluorescence quenching efficiency ( $K_{sv}$ ) of some previously reported MOF sensors.

| MOF                                                          | $K_{sv}$ ( $M^{-1}$ ) | References |
|--------------------------------------------------------------|-----------------------|------------|
| $[(CH_3)_2NH_2]_2[Cd_3(NTB)_2(BDC)] \cdot 4DMF$ ( <b>1</b> ) | $9.65 \times 10^4$    | This work  |
| $[Tb_2(H_2L)_3(H_2O)_2] \cdot 21H_2O$                        | $9.20 \times 10^3$    | [1]        |
| $[Zn_2(L)_2(bpy)]$                                           | $1.53 \times 10^4$    | [2]        |
| $[Zn_2(L)_2(azp)]$                                           | $3.11 \times 10^4$    | [2]        |
| $[NH_2(CH_3)_2][Zn_4O(bpt)_2(bdc)_{0.5}]$                    | $1.69 \times 10^4$    | [3]        |
| $[NH_2(CH_3)_2][Zn_4O(bpt)_2(bdc-NH_2)_{0.5}]$               | $6.19 \times 10^4$    | [3]        |
| $[Zn_3(L)_2(bipy)(\mu_3-OH)_2] \cdot 3H_2O$                  | $2.30 \times 10^4$    | [4]        |
| $[Cd(5-BrIP)(TIB)]_n$                                        | $2.68 \times 10^4$    | [5]        |
| $[Li]_4[Cd_3Li_2(BDC)_6]$                                    | $7.83 \times 10^4$    | [6]        |

1 R. Fu, S. Hu and X. Wu, *J. Mater. Chem. A.*, 2017, **5**, 1952-1956.

2 S. Senthilkumar, R. Goswami, N.L. Obasi and S. Neogi, *Acs Sustain Chem & Eng.*, 2017, **5**, 11307-11315.

3 S. Xing, Q.M. Bing, H. Qi, J. Liu, T. Bai, G. Li, Z. Shi, S. Feng and R. Xu, *Acs Appl Mater Inter.*, 2017, **28**, 23828-23835.

4 J. L. Du, X. Y. Zhang, C. P. Li, J. P. Gao, J. X. Hou, X. Jing, Y. J. Mu and L. J. Li, *Sensor*



*Actuat B-Chem.*, 2018, **257**, 207-213.

5 Y. Rachuri, B.Parmar, K. K. Bisht and S. Eringathodi, *Dalton Trans.*, 2016, **45**, 7881-7892.

6 X. Qi, Y. Jin, N. Li, Z. Wang, K. Wang, and Q. Zhang, *Chem Comm.*, 2017, **53**, 10318-10321.
